# Supplementary material for: Structure-based mechanism for Na+/melibiose symport by MelB
Source: PubMed Central journal article supplement — Nat Commun. 2014 Jan 6;5:3009. doi: 10.1038/ncomms4009 (PMC4026327; doi:10.1038/ncomms4009), 2014-01-06
Supplement: NIHMS560147-supplement-1.pdf [file NIHMS560147-supplement-1.pdf]

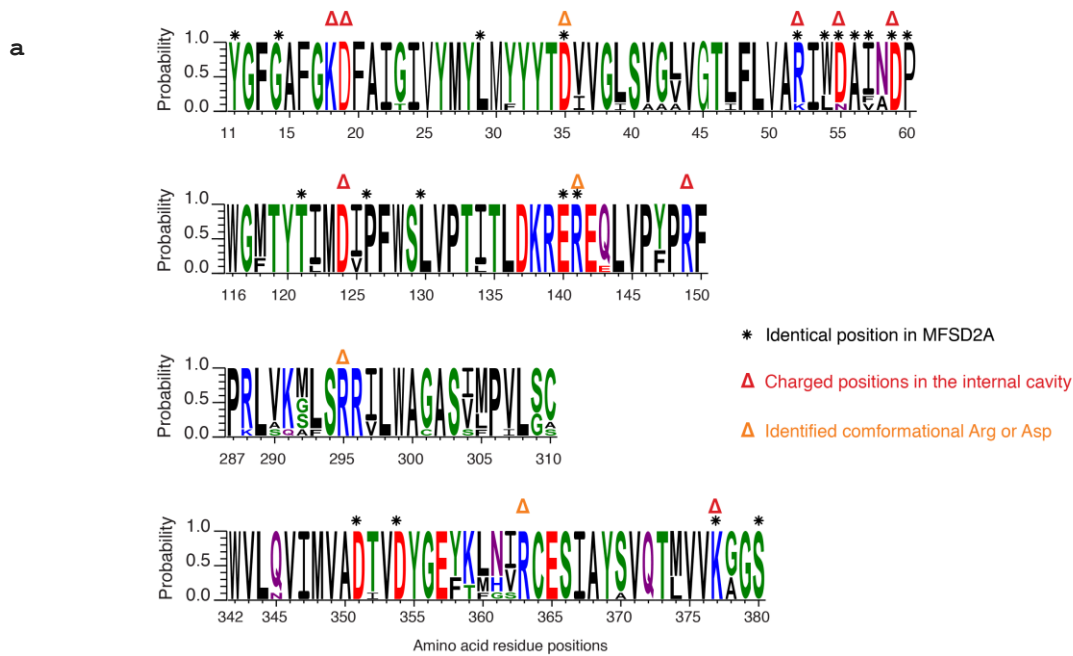

b

|                                 | Cation-binding site  | I-2                                     |
|---------------------------------|----------------------|-----------------------------------------|
| MelB_Salmonella typhimurium     | 48-FLVARIWDAINDP-60  | 120-YTIMDIPFWSLVPTITLTKREBREQLVFFPR-149 |
| MelB_Klebsiella pneumoniae      | 48-FLVARILDAIADP-60  | 120-YTIMDIPFWSLVPTITLTKREQLVPYPRFF-149  |
| MelB_Enterobacter aerogenes     | 48-FLVARILDAIADP-60  | 120-YTIMDIPFWSLVPTITLTKREBREQLVYPR-149  |
| MelB_E.coli                     | 48-FLVARIWDAINDP-60  | 120-YTIMDIPFWSLVPTITLTKREBREQLVYPR-149  |
| MelB_Shigella flexneri          | 44-FLVARIWDAINDP-56  | 120-YTIMDIPFWSLVPTITLTKREBREQLVYPR-145  |
| MelB_Salmonella typhi           | 48-FLVARIWDAINDP-60  | 120-YTIMDIPFWSLVPTITLTKREBREQLVFFPR-149 |
| MelB_Salmonella paratyphi       | 48-FLVARIWDAINDP-60  | 120-YTIMDIPFWSLVPTITLTKREBREQLVFFPR-149 |
| MelB_Citrobacter freundii       | 48-FLVARIWDAFNDP-60  | 120-YTIMDIPFWSLVPTITLTKREBREQLVYPR-148  |
| MelB_Vibrio shilonii            | 48-FLVARIWDAVNDP-60  | 120-YTLMIPFWSLVPTITLTKREBREQLVYPR-149   |
| LacS_Streptococcus thermophilus | 60-ISILRILEVFIIDP-72 | 135-YSIKDIGFWSMLPALSLDSHREKMATFAR-164   |
| GalP_Lactococcus lactis         | 55-VVIRLVEIIFIDP-68  | 133-YSFKDIAFWSMIPALSEKNSERETLGTFFAR-162 |
| XylP_Lactobacillus pentosus     | 72-FLVARIWDAFNGP-84  | 144-YSAVNIPIITSILPSLTSNPQBRVTLSTIRP-173 |
| GusB_E.coli                     | 50-LLVVRVDFAFADV-62  | 123-YSLVNIPIYGSLATAMTQQPQSRARLGAARG-152 |
| TogT_Klebsiella pneumoniae      | 45-FSVASIIDAINP-57   | 116-YTSIMVPYETLATEMTDDFSLRSKLTGYKA-145  |
| Sucrose transporter 1_Zea mays  | 76-WLCGPIAGLVVQPP-88 | 161-DFSNNITVQGPARAMMADLCGHGPGSAANSI-190 |
| MFSD2A_Homosapiens              | 99-LFVGRAMDAITDP-111 | 171-VTCFHVYPYSALTMFISTEQTBRSATAYRM-200  |
| MFSD2B_Homosapiens              | 84-LFGGKVSAAADP-96   | 156-ATFFQVPYALTMLLTPCPREBRSATAYRM-185   |

  

|                                 | I-1                 | I-2                      | I-3 |
|---------------------------------|---------------------|--------------------------|-----|
| MelB_Salmonella typhimurium     | 287-PRLVKMLSRRI-297 | 351-DTVDYGEFKLNIRCE-365  |     |
| MelB_Klebsiella pneumoniae      | 287-PRLVKGLSRRI-297 | 351-DTVDYGEYTMNIRCE-365  |     |
| MelB_Enterobacter aerogenes     | 287-PRLVKGLSRRI-297 | 351-DTVDYGEYTMNIRCE-365  |     |
| MelB_E.coli                     | 287-PRLVKLSLRRI-297 | 351-DIVDYGEYKLVHVRCE-365 |     |
| MelB_Shigella flexneri          | 283-PRLVKLSLRRI-293 | 347-DTVDYGEYKLVHVRCE-361 |     |
| MelB_Salmonella typhi           | 287-PRLVKMLSRRI-297 | 351-DTVDYGEFKLNIRCE-365  |     |
| MelB_Salmonella paratyphi       | 287-PRLVKMLSRRI-297 | 351-DTVDYGEFKLNIRCE-365  |     |
| MelB_Citrobacter freundii       | 286-PRLSKALSRRV-296 | 350-DTVDYGEYKFNVRCE-364  |     |
| MelB_Vibrio shilonii            | 287-PKLAQMFSSRV-297 | 351-DTVDYGEYKLGSRCE-365  |     |
| LacS_Streptococcus thermophilus | 305-PSLAGKFNRRK-315 | 365-DSVEYGQWKTHRDE-379   |     |
| GalP_Lactococcus lactis         | 300-PTLAKKFGRRK-310 | 359-DSVEYGQWKNGVRNE-373  |     |
| XylP_Lactobacillus pentosus     | 308-PWTAKRIKRN-318  | 370-DSVDYGEWKNGVRAE-384  |     |
| GusB_E.coli                     | 281-APLVPGMVARI-291 | 346-DTVEYGEYLTGVRIE-360  |     |
| TogT_Klebsiella pneumoniae      | 289-GLCVKKGFSKP-299 | 358-DVDELYTGRREGIY-372   |     |
| Sucrose Transporter 1_Zea mays  | 332-QISAFDEGVRV-342 | 398-DYHGYYQDAITASTS-412  |     |
| MFSD2A_Homosapiens              | 361-QWFLTRFGKKT-371 | 421-DVIDDFHLKQEHFHG-435  |     |
| MFSD2B_Homosapiens              | 337-EWWLQRFKKT-346  | 395-DVVDDFQLQRRHGGPG-409 |     |

**Supplementary Figure S1 | Sequence alignment.** **a**, MelB orthologues with MFSD2A. Four stretches (11-60, 116-150, 287-310, 342-360) of primary-sequence alignments of MelB<sub>St</sub> (Gene ID: 16767549) with other MelB orthologues from *Klebsiella pneumoniae*, GI:150957831; *Enterobacter aerogenes*, GI:3914018; *E. coli*, GI:353526256; *Salmonella typhi*, GI:20141536; *Shigella flexneri*, GI:81723953; *Salmonella paratyphi*, GI:81360816; *Citrobacter freundii*, GI:75416057; *Vibrio shilonii*, Uniprot:A6CV97; MFSD2A, GI: 74751132 (Weblogos3.0). **b**, MelB with other GPH members. MelB<sub>St</sub> (GI: 16767549) orthologues include *Klebsiella pneumoniae*, GI:150957831; *Enterobacter aerogenes*, GI:3914018; *E. coli*, GI:353526256; *Shigella flexneri*, GI:81723953; *Salmonella typhi*, GI:20141536; *Salmonella paratyphi*, GI:81360816; *Citrobacter freundii*, GI:75416057; and *Vibrio shilonii*, Uniprot:A6CV97. MelB homologues of GPH family include LacS of *Streptococcus thermophiles*, GI:386345083; GalP of *Lactococcus lactis*, GI:4995688; XylP of *Lactobacillus pentosus*, GI:3688059; GusB of *E. coli*, GI:292630909; Oligogalacturonide transporter (TogT) of *Klebsiella pneumoniae*, GI:206580788; Sucrose transporter 1 of *Zea mays*, GI:162463612; human MFSD2A, GI:74751132; and human MFSD2B, GI:298286913. Paired alignment of four stretches of primary sequences between MelB<sub>St</sub> and each protein were done manually. The three Asp residues (55, 59 and 124) important for Na<sup>+</sup> binding and three Arg (295, 141 and 363) and two Asp residues (351 and 354) important for lock interactions in MelB<sub>St</sub> are highlighted.

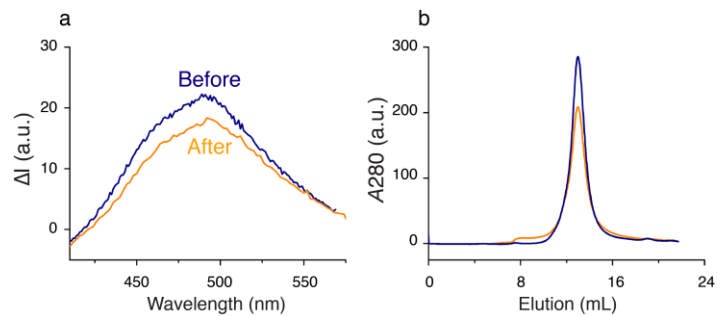

**Supplementary Figure S2 | Stability of MelB<sub>St</sub>.** Purified MelB<sub>St</sub> proteins were incubated at 23°C for five days, and the samples before (blue) and after (orange) incubation were tested for stability. **a**, D<sup>2</sup>G binding. D<sup>2</sup>G FRET emission spectra ( $\Delta I$ ) obtained by displacement of D<sup>2</sup>G with 50 mM melibiose. **b**, Gel filtration chromatography profiles (100  $\mu$ g MelB<sub>St</sub>).

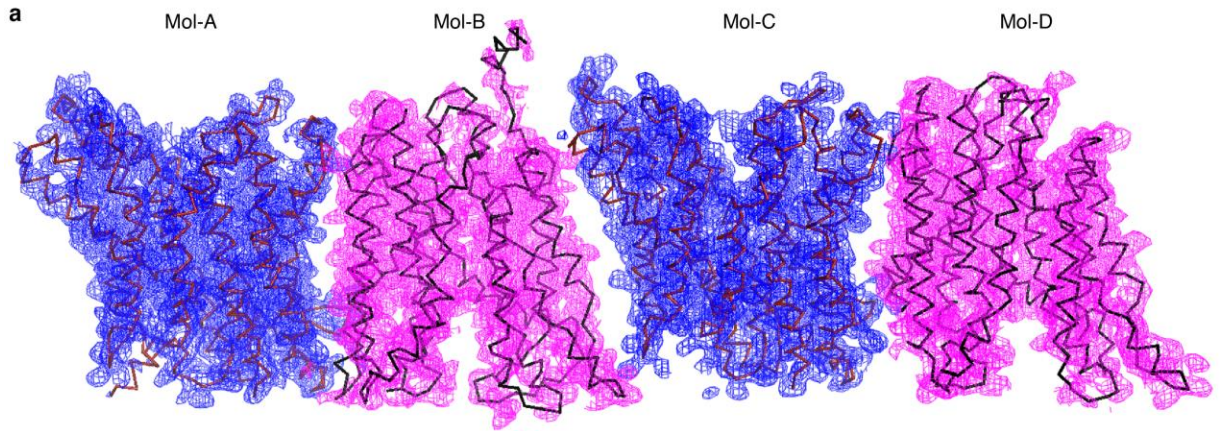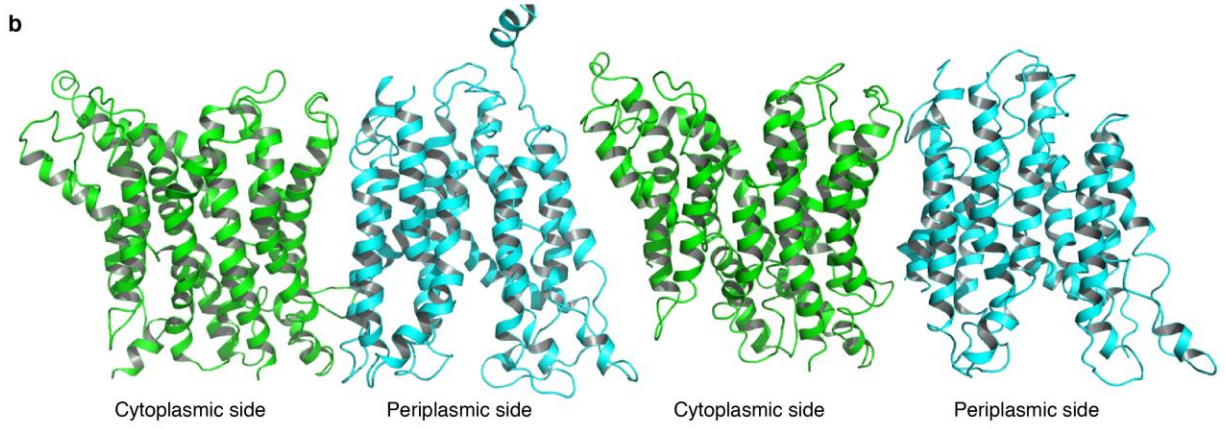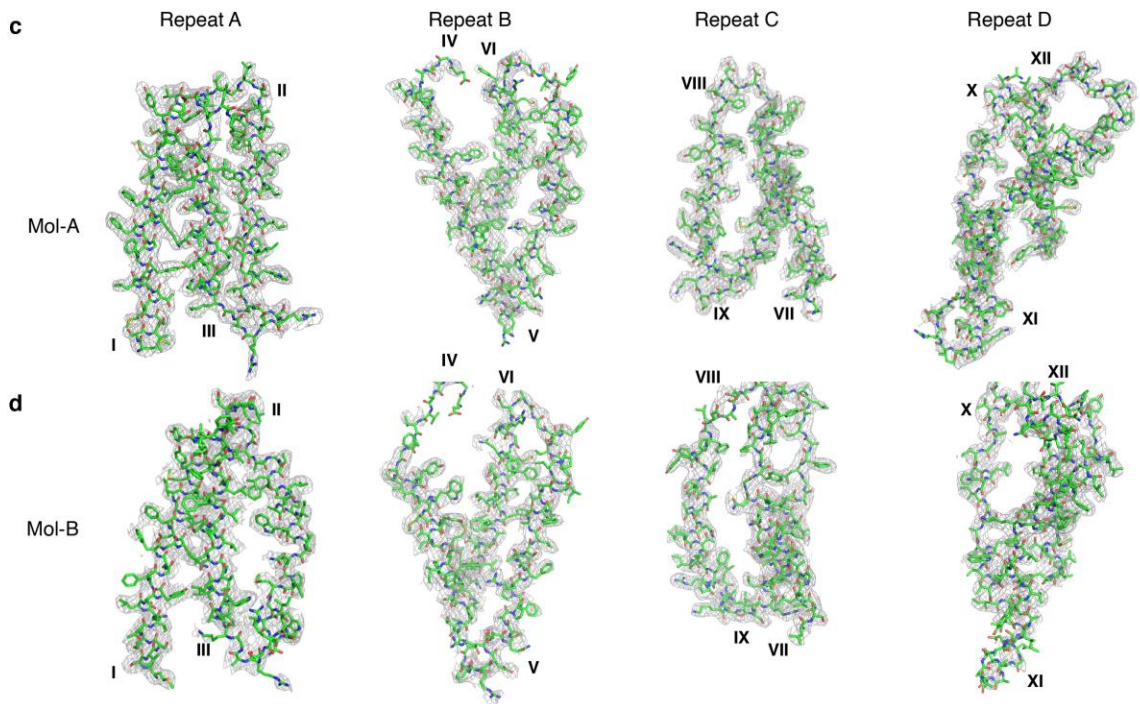

**Supplementary Figure S3 | Electron density maps of MelB<sub>st</sub>.** **a**, The 2Fo-Fc maps of four molecules of MelB<sub>st</sub> contoured at 1.0  $\sigma$ . Mol-A and Mol-C (blue mesh) and Mol-B and Mol-D (pink mesh) are related by 0.5 pseudo-translational symmetry along the *c* axis. **b**, The overall fold of Mol-A and Mol-C (green), Mol-B and Mol-D (cyan) in the asymmetric unit are shown as cartoon models. The N-terminal domain is on the left side of each molecule. **c and d**, The 2Fo-Fc electron density maps contoured at 1.0  $\sigma$  for helices in each repeats. The helices are oriented for clear views of the density maps.



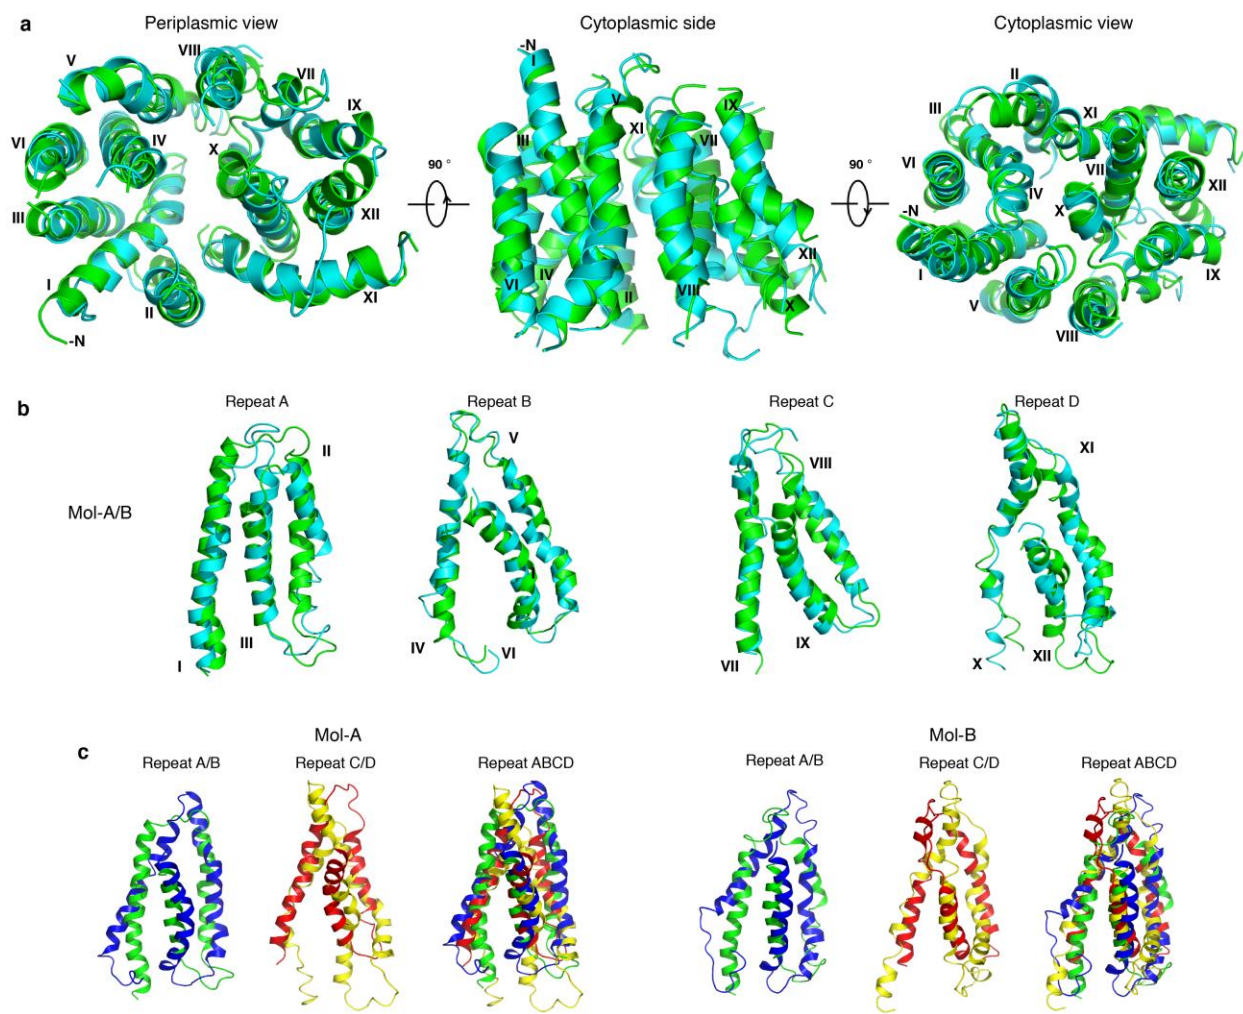

**Supplementary Figure S4 | Repeats of MelB<sub>St</sub>.** **a**, Superposition of the overall structure of Mol-B (cyan) on Mol-A (green) viewed parallel or perpendicular to the membrane plane. **b**, Superposition of the overall structure of Mol-B (cyan) on Mol-A (green) is presented by four separate repeats. **c**, Superposition of repeats.

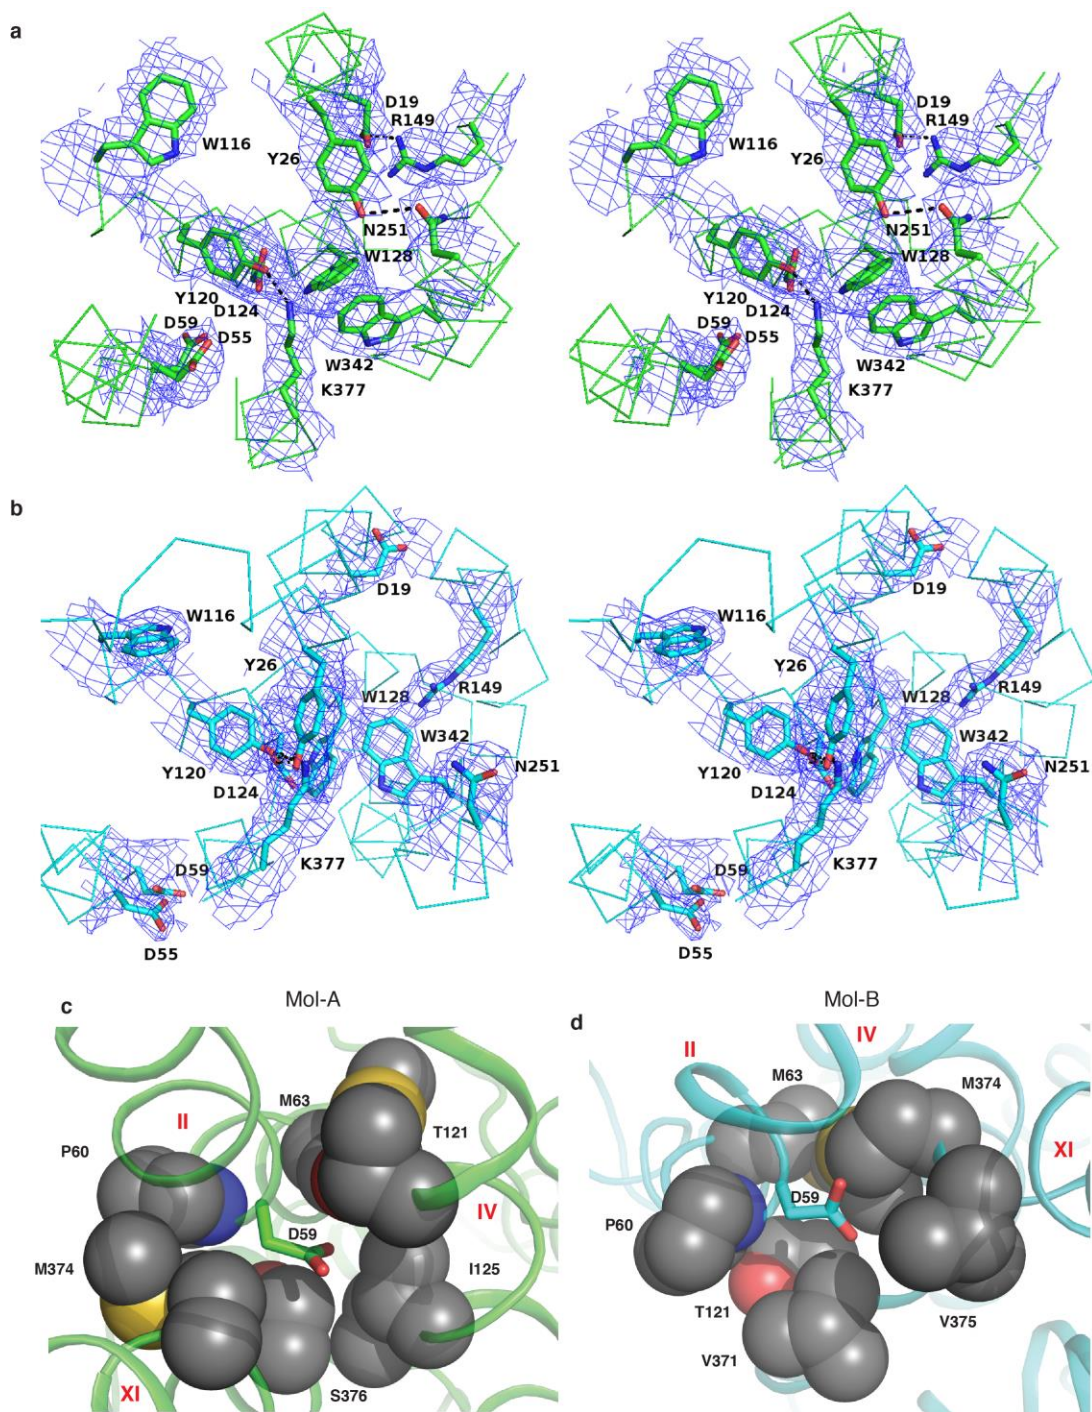

**Supplementary Figure S5 | The internal cavity.** Wall-eyed stereo view of the 2Fo-Fc maps of the cation- and sugar-binding residues in Mol-A (a) and Mol-B (b) contoured at 1.0  $\sigma$ . Asp<sup>59</sup> is surrounded by hydrophobic residues in Mol-A (c) and in Mol-B (d).

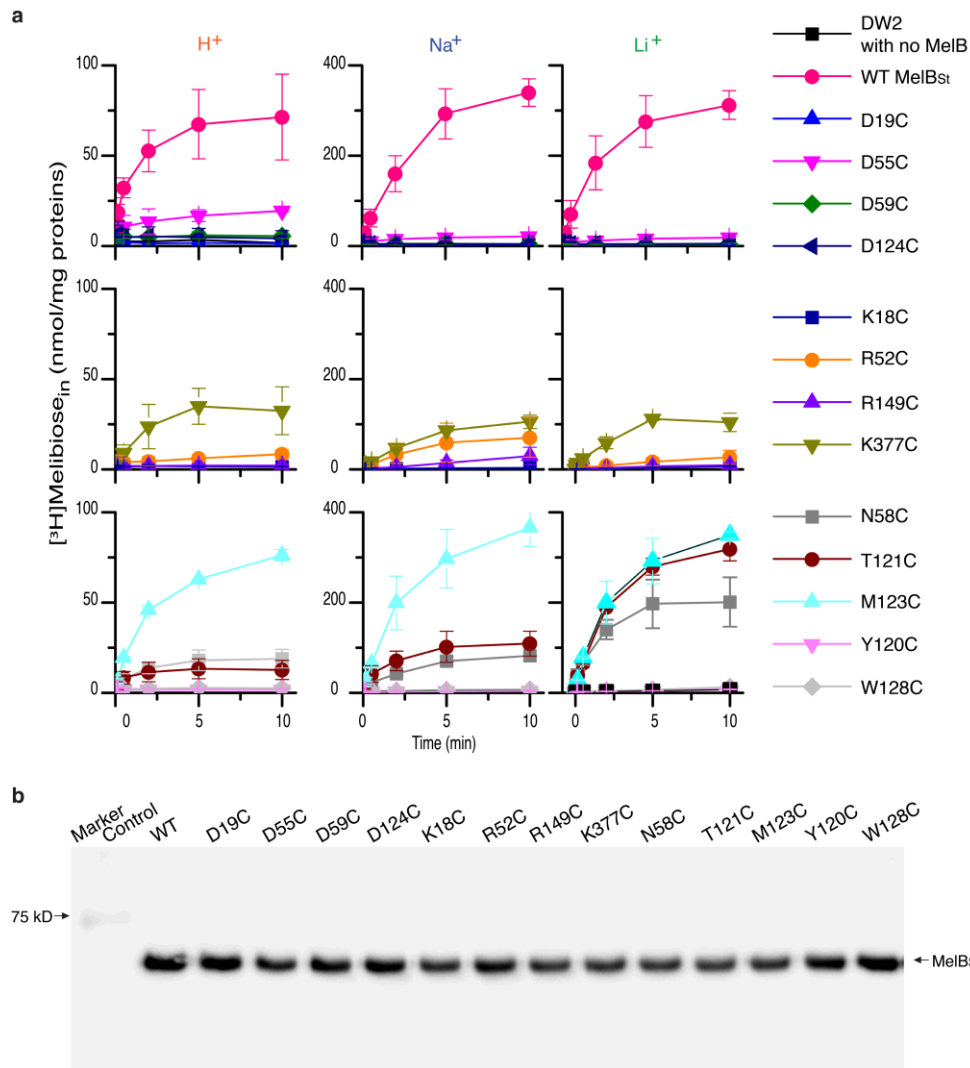

**Supplementary Figure S6 | Mutational analysis. a, Melibiose transport time course.** Intact *E. coli* DW2 cells (*melA*<sup>+</sup>,  $\Delta melB$ ,  $\Delta lacZY$ ), over-expressing WT MelB<sub>St</sub> or a given single-site Cys mutant, were assayed with [<sup>3</sup>H]melibiose transport (0.4 mM) in the absence or presence of 20 mM NaCl or LiCl. Error bar, s.e.m., n = 2 for mutants and n = 10 for the WT and DW2. **b, Western blotting.** 25  $\mu$ g of RSO membranes were loaded onto each well of SDS-16% PAGE. MelB<sub>St</sub> proteins were detected with anti-His tag antibody, and imaged by the *ImageQuant LAS 4000 Biomolecular Imager*. Protein marker with 75 kD is loaded on the same well with the negative control sample that contains the RSO vesicles prepared from DW2 cells without MelB.



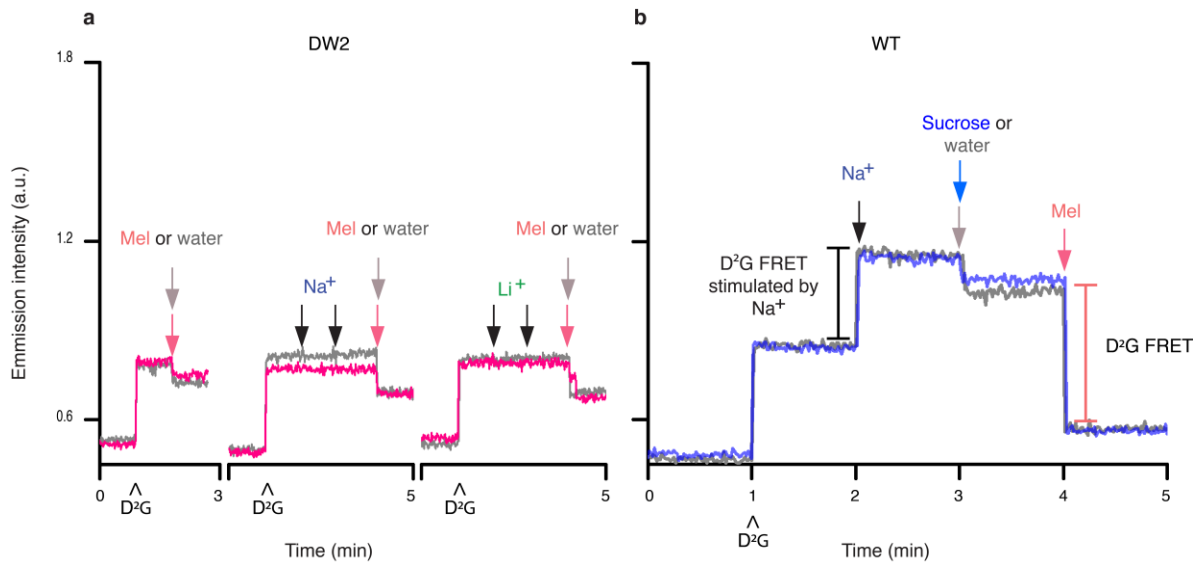

**Supplementary Figure S7 | Control experiments for Trp→D<sup>2</sup>G FRET.** Experimental setup was identical as described in Fig. 3d. **a, The negative control experiments.** RSO vesicles prepared with DW2 cells in the absence of MelB were used as the negative control. The assay was carried out under identical protocol as described in Fig. 3d. **b, Specificity.** RSO vesicles prepared with DW2 cells in the presence of MelB<sub>St</sub> were used as the positive control. After the addition of 10 μM D<sup>2</sup>G, 20 mM NaCl, 120 mM sucrose or the same volume of water were added step by step. For both traces, 120 mM melibiose was added at the last step. The Na<sup>+</sup> stimulation of D<sup>2</sup>G FRET and melibiose displacement of D<sup>2</sup>G bound with MelB<sub>St</sub> are illustrated by black and pink blunt-ended bars, respectively.

a MelB (4M64-A)

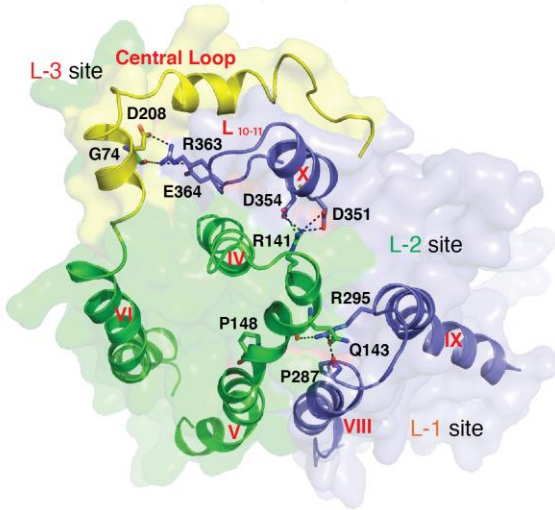

b XylE (Outward occluded, 4GBY)

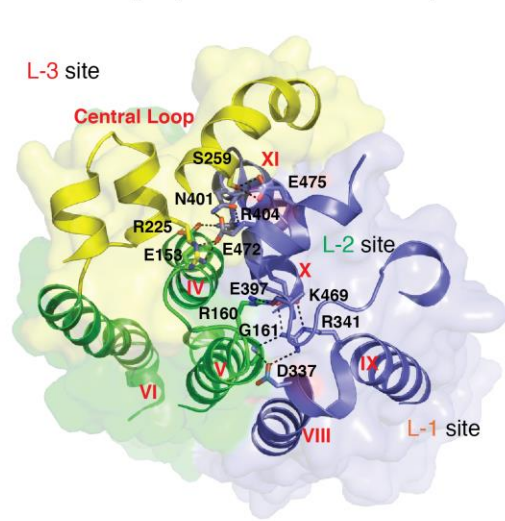

c FucP (Outward, 3O7Q)

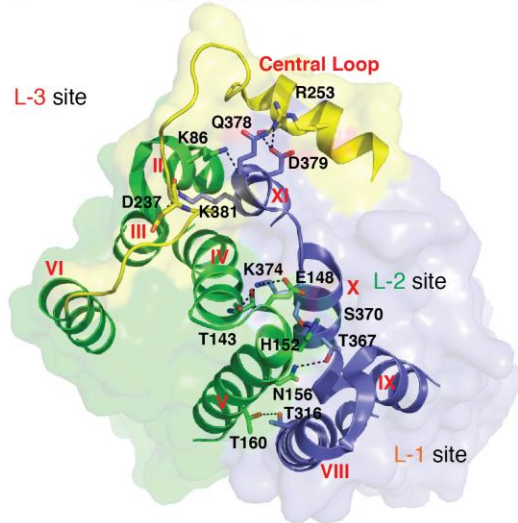

d XylE (Inward partially occluded, 4JA3)

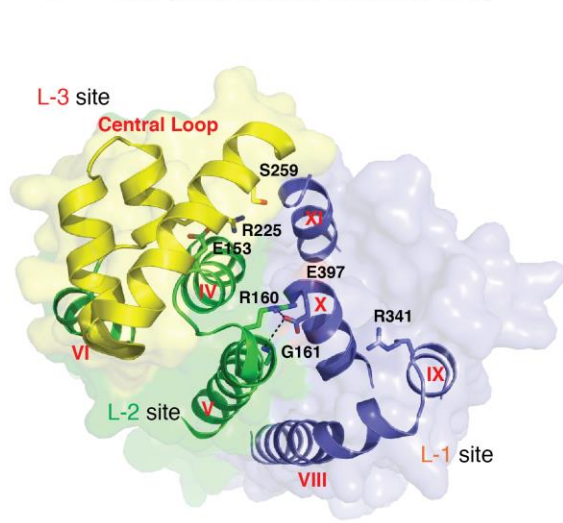

e PiPT (Inward occluded, 4J05)

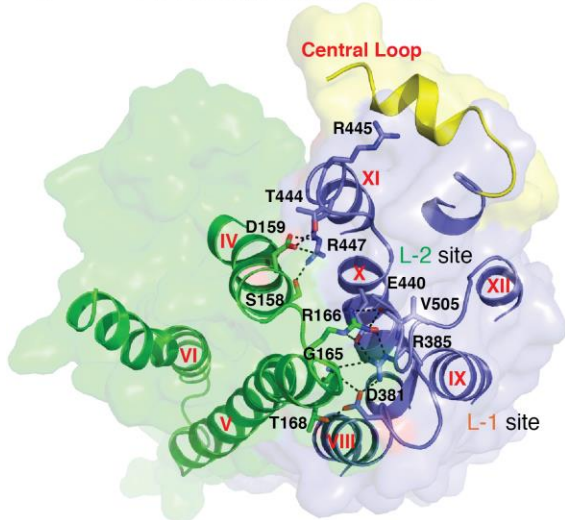

f XylE (Partial inward, 4JA4)

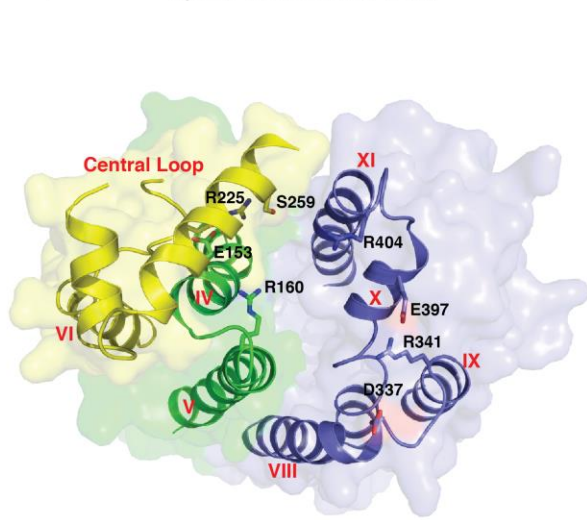

**Supplementary Figure S8 | Locks in MFS crystal structures.** Surface presentation of all structures with an aligned origin: the N- and C-terminal domains are shown in green and blue, respectively, with the central loop in yellow. The helices are labeled with Roman numerals. Lock interactions are shown as broken lines.
